# Supplementary material for: Spin and valence variation in cobalt doped barium strontium titanate ceramics
Source: Royal Society of Chemistry journal article supplement (doi:10.1039/d2cp01561g), 2022-01-01
Supplement: d2cp01561g1.pdf [file d2cp01561g1.pdf]

## ELECTRONIC SUPPLEMENTARY INFORMATIONSHEET

### Spin, valence variation and half metallicity in Cobalt doped Barium Strontium Titanate Ceramics

Anumeet Kaur<sup>1\*</sup>, Deobrat Singh<sup>2</sup>, Arkaprava Das<sup>3\*</sup>, K. Asokan<sup>4,5</sup>, L. Chen<sup>6</sup>

Indu Bhusan Mishra<sup>7</sup> and Rajeev Ahuja<sup>8</sup>

<sup>1</sup>Department of Physics, Guru Nanak Dev University, Amritsar, Punjab 143005, India

<sup>2</sup>Condensed Matter Theory Group, Materials Theory Division, Department of Physics and Astronomy, Uppsala University, Box 516, 75120 Uppsala, Sweden

<sup>3</sup>Materia Nova, University of Mons, Place du parc 20, 7000 Mons, Belgium

<sup>4</sup>Inter University Accelerator Centre, Aruna Asaf Ali Marg, New Delhi 110067, India

<sup>5</sup>Department of Physics & Centre for Interdisciplinary Research, University of Petroleum and Energy Studies (UPES) Dehradun, Uttarakhand, India 248007.

<sup>6</sup>National Synchrotron Radiation Research Center, Hsinchu, 30076, Taiwan

<sup>7</sup>School of Molecular Sciences, Arizona State University, Tempe, AZ 85287, USA

<sup>8</sup>Department of Physics, Indian Institute of Technology Ropar, Punjab, 140001

#### FIGURES:

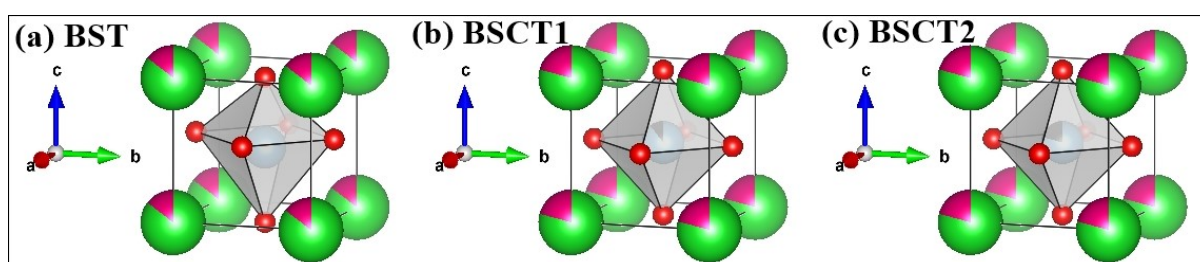

ESF 1: Crystal Structure of BST, BSCT1 and BSCT2 generated using vista software

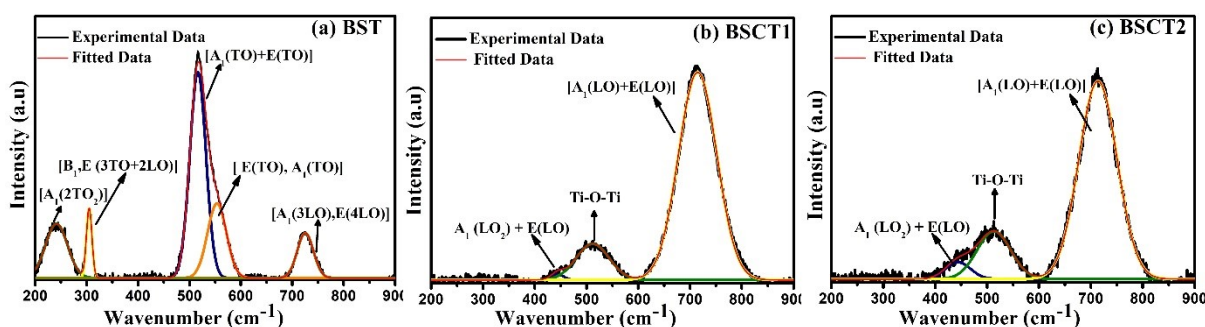

ESF 2: Deconvoluted Raman Spectra of BST, BSCT1 and BSCT2

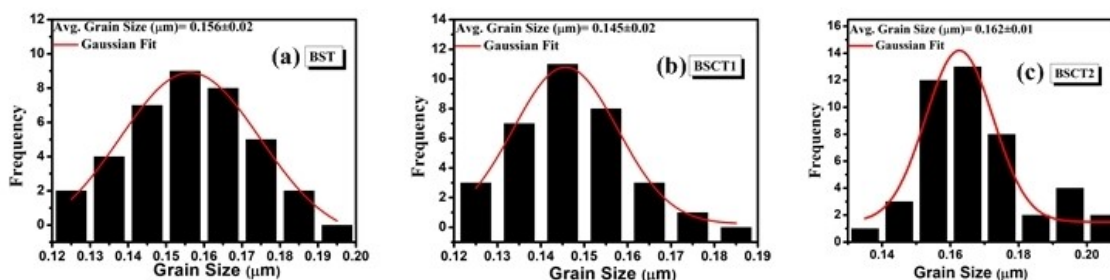

ESF 3: Grain Size calculated from SEM Image for BST, BSCT1 and BSCT2 using ImageJ software

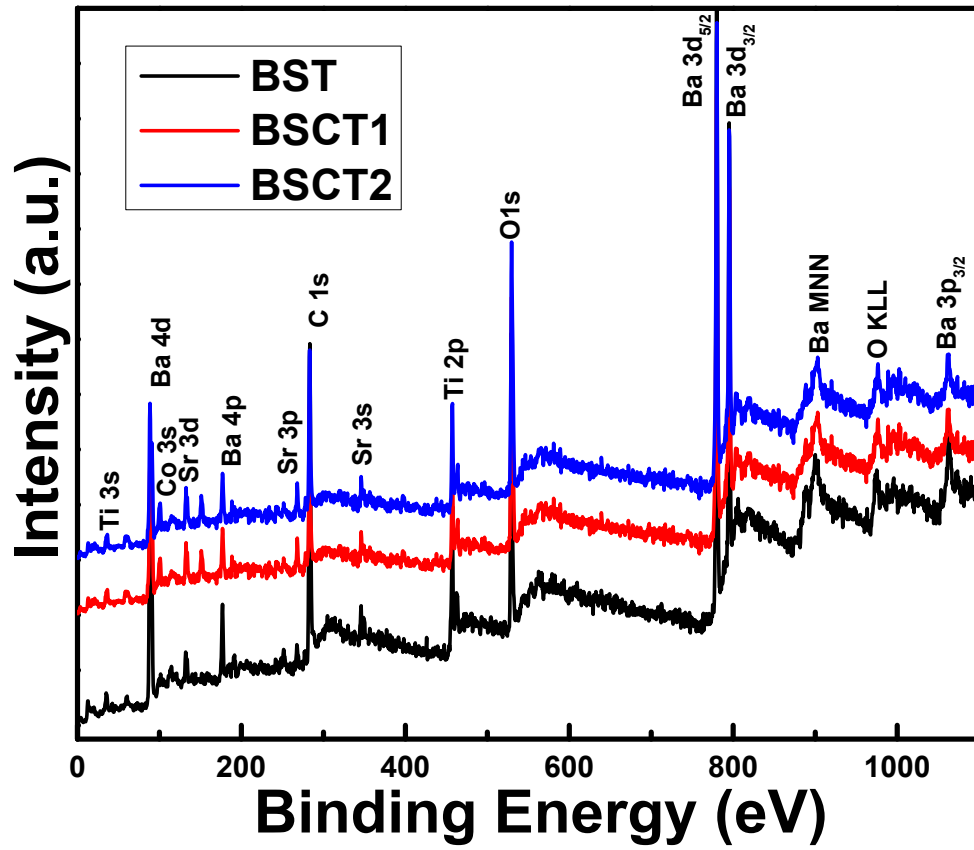

ESF4: Survey Scan for BST, BSCT1 and BSCT2

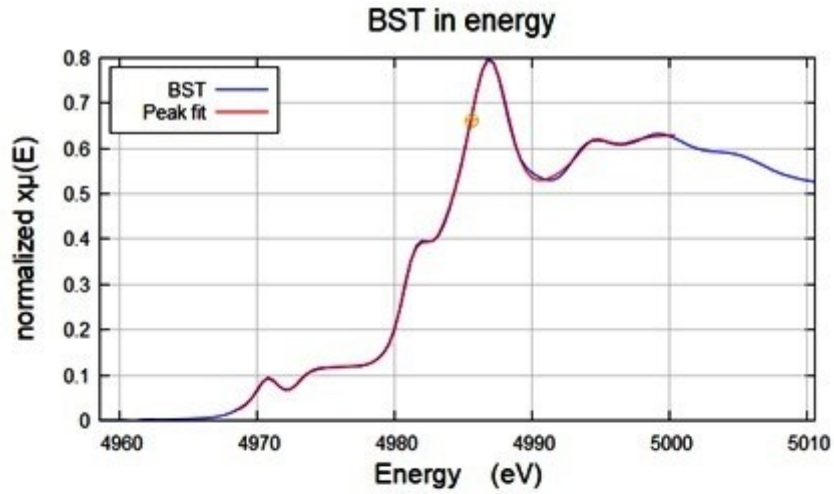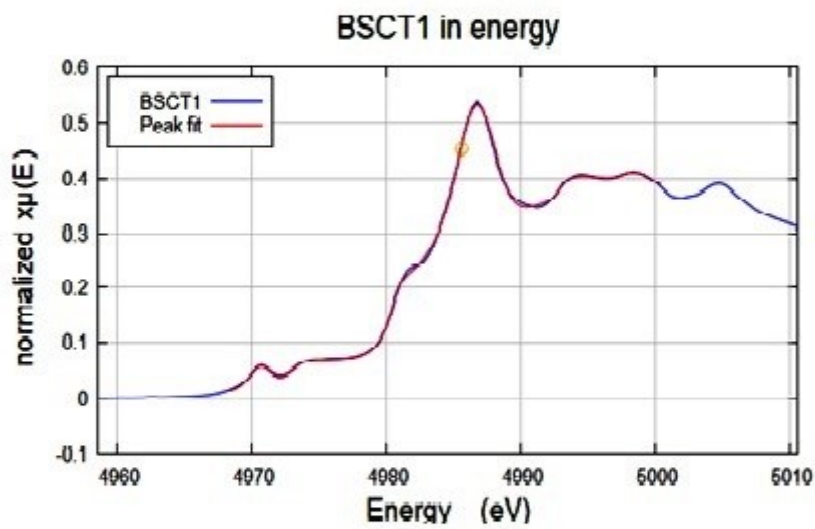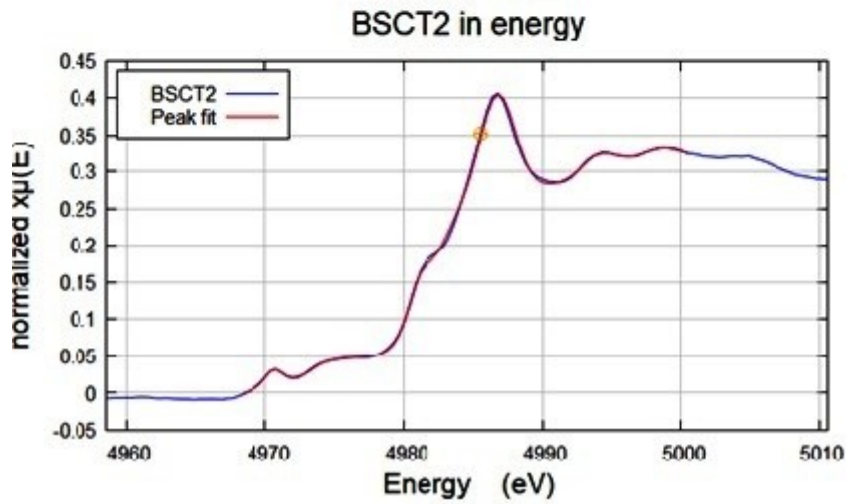

**ESF5:** The Fitted spectra for Ti K edge XANES spectra, generated from Athena for BST, BSCT1 and BSCT2

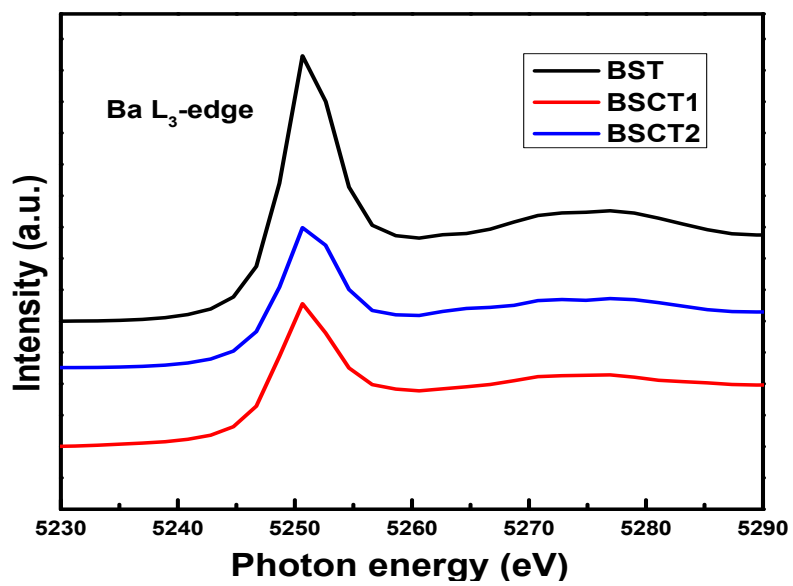

ESF6: Ba  $L_3$ -edge XANES Spectra for BST, BSCT1 and BSCT2

**Tables:****EST1: Refined Parameters of BST, BSCT1 and BSCT2**

| <b>BST</b> Tetragonal phase with space group $P4mm$ ,                                                                    |                            |              |                  |                          |                 |
|--------------------------------------------------------------------------------------------------------------------------|----------------------------|--------------|------------------|--------------------------|-----------------|
| Cell parameters: $a = b = 3.986 (2) \text{ \AA}$ , $c = 4.008 (7) \text{ \AA}$ Volume = $63.692 (0.004) (\text{ \AA})^3$ |                            |              |                  |                          |                 |
| Ions                                                                                                                     | $x_T$                      | $y_T$        | $z_T$            | $B_{iso}(\text{ \AA}^2)$ | Occupancy       |
| Ba <sup>2+</sup> (1a)                                                                                                    | 0.00000                    | 0.00000      | 0.00000          | 0.669                    | 0.079           |
| Sr <sup>2+</sup> (1a)                                                                                                    | 0.00000                    | 0.00000      | 0.00000          | 0.669                    | 0.034           |
| Ti <sup>4+</sup> (1b)                                                                                                    | 0.50000                    | 0.50000      | 0.46900          | 0.128                    | 0.112           |
| O <sub>I</sub> <sup>2-</sup> (1b)                                                                                        | 0.50000                    | 0.50000      | -0.04933         | 0.201                    | 0.125           |
| O <sub>I</sub> <sup>2-</sup> (2c)                                                                                        | 0.50000                    | 0.00000      | 0.54804          | 0.077                    | 0.250           |
| R-factors                                                                                                                | $R_{B(Tetragonal)} = 6.20$ | $R_p = 7.53$ | $R_{w-p} = 9.62$ | $R_{exp} = 8.43$         | $\chi^2 = 1.30$ |
| <b>BSCT1</b> Cubic phase with space group $Pm\bar{3}m$ ,                                                                 |                            |              |                  |                          |                 |
| Cell parameters: $a = b = c = 3.9860 (7) \text{ \AA}$ Volume = $63.333 (0.003) (\text{ \AA})^3$                          |                            |              |                  |                          |                 |
| Ions                                                                                                                     | $x_T$                      | $y_T$        | $z_T$            | $B_{iso}(\text{ \AA}^2)$ | Occupancy       |
| Ba <sup>2+</sup> (1a)                                                                                                    | 0.00000                    | 0.00000      | 0.00000          | 0.689                    | 0.017           |
| Sr <sup>2+</sup> (1a)                                                                                                    | 0.00000                    | 0.00000      | 0.00000          | 0.689                    | 0.004           |
| Ti <sup>4+</sup> (1b)                                                                                                    | 0.50000                    | 0.50000      | 0.50000          | 0.171                    | 0.019           |
| Co <sup>2+</sup> (1b)                                                                                                    | 0.50000                    | 0.50000      | 0.50000          | 0.171                    | 0.002           |
| O <sub>I</sub> <sup>2-</sup> (3c)                                                                                        | 0.50000                    | 0.50000      | 0.00000          | 1.379                    | 0.062           |
| R-factors                                                                                                                | $R_{B(Cubic)} = 9.45$      | $R_p = 11.9$ | $R_{w-p} = 15.2$ | $R_{exp} = 13.73$        | $\chi^2 = 1.22$ |
| <b>BSCT2</b> Cubic phase with space group $Pm\bar{3}m$ ,                                                                 |                            |              |                  |                          |                 |
| Cell parameters: $a = b = c = 3.9871 (4) \text{ \AA}$ Volume = $63.395 (0.006) (\text{ \AA})^3$                          |                            |              |                  |                          |                 |
| Ions                                                                                                                     | $x_T$                      | $y_T$        | $z_T$            | $B_{iso}(\text{ \AA}^2)$ | Occupancy       |
| Ba <sup>2+</sup> (1a)                                                                                                    | 0.00000                    | 0.00000      | 0.00000          | 0.067                    | 0.017           |
| Sr <sup>2+</sup> (1a)                                                                                                    | 0.00000                    | 0.00000      | 0.00000          | 0.067                    | 0.004           |
| Ti <sup>4+</sup> (1b)                                                                                                    | 0.50000                    | 0.50000      | 0.50000          | 0.227                    | 0.017           |
| Co <sup>2+</sup> (1b)                                                                                                    | 0.50000                    | 0.50000      | 0.50000          | 0.227                    | 0.004           |
| O <sub>I</sub> <sup>2-</sup> (3c)                                                                                        | 0.50000                    | 0.50000      | 0.00000          | 1.427                    | 0.062           |
| R-factors                                                                                                                | $R_{B(Cubic)} = 6.82$      | $R_p = 8.60$ | $R_{w-p} = 10.9$ | $R_{exp} = 9.28$         | $\chi^2 = 1.39$ |

**EST2: The parameters obtained from XPS data fitting BST, BSCT1 and BSCT2**

| <b>BST (Ba 3d<sub>5/2</sub>)</b>   | <b>Peak position(eV)</b> | <b>FWHM</b> | <b>Peak area</b> |
|------------------------------------|--------------------------|-------------|------------------|
| Beta phase                         | 779.6                    | 1.59        | 12437            |
| Alpha Phase                        | 777.9                    | 2.60        | 860              |
| <b>BCST1 (Ba 3d<sub>5/2</sub>)</b> | <b>Peak position(eV)</b> | <b>FWHM</b> | <b>Peak area</b> |
| Beta phase                         | 779.6                    | 1.56        | 11430            |
| Alpha Phase                        | 777.9                    | 2.92        | 1327             |
| <b>BCST2 (Ba 3d<sub>5/2</sub>)</b> | <b>Peak position(eV)</b> | <b>FWHM</b> | <b>Peak area</b> |
| Beta phase                         | 779.8                    | 1.66        | 10039            |
| Alpha phase                        | 778.0                    | 2.56        | 1811             |
|                                    |                          |             |                  |
| <b>BST</b>                         | <b>Peak position(eV)</b> | <b>FWHM</b> | <b>Peak area</b> |

|                                          |                           |             |                  |
|------------------------------------------|---------------------------|-------------|------------------|
| (Sr 3d <sub>5/2</sub> )                  | 132.8                     | 1.18        | 585              |
| <b>BCST1</b>                             | <b>Peak position(eV)</b>  | <b>FWHM</b> | <b>Peak area</b> |
| (Sr 3d <sub>5/2</sub> )                  | 132.7                     | 1.01        | 361              |
| <b>BCST2</b>                             | <b>Peak position(eV)</b>  | <b>FWHM</b> | <b>Peak area</b> |
| (Sr 3d <sub>5/2</sub> )                  | 132.9                     | 1.34        | 270              |
|                                          |                           |             |                  |
| <b>BCST1</b>                             | <b>Peak position(eV)</b>  | <b>FWHM</b> | <b>Peak area</b> |
| (Co 2p <sub>3/2</sub> ) Co <sup>3+</sup> | 779.8                     | 1.67        | 12526            |
| (Co 2p <sub>3/2</sub> ) Co <sup>2+</sup> | 777.7                     | 2.36        | 1797             |
|                                          |                           |             |                  |
| <b>BCST2</b>                             | <b>Peak position(eV)</b>  | <b>FWHM</b> | <b>Peak area</b> |
| (Co 2p <sub>3/2</sub> ) Co <sup>3+</sup> | 779.8                     | 1.39        | 1487             |
| (Co 2p <sub>3/2</sub> ) Co <sup>2+</sup> | 777.9                     | 1.89        | 10002            |
|                                          |                           |             |                  |
| <b>BST</b>                               | <b>Peak position(eV)</b>  | <b>FWHM</b> | <b>Peak area</b> |
| (Ti 2p <sub>3/2</sub> ) Ti <sup>4+</sup> | 457.2                     | 1.24        | 2210             |
| (Ti 2p <sub>3/2</sub> ) Ti <sup>2+</sup> | 456.0                     | 2.96        | 1417             |
|                                          |                           |             |                  |
| <b>BCST1</b>                             | <b>Peak position(eV)</b>  | <b>FWHM</b> | <b>Peak area</b> |
| (Ti 2p <sub>3/2</sub> ) Ti <sup>4+</sup> | 457.2                     | 1.28        | 1961             |
| (Ti 2p <sub>3/2</sub> ) Ti <sup>2+</sup> | 456.0                     | 1.68        | 550              |
|                                          |                           |             |                  |
| <b>BCST2</b>                             | <b>Peak position(eV)</b>  | <b>FWHM</b> | <b>Peak area</b> |
| (Ti 2p <sub>3/2</sub> ) Ti <sup>4+</sup> | 457.3                     | 1.32        | 903              |
|                                          |                           |             |                  |
| <b>BST</b>                               | <b>Peak position(eV)</b>  | <b>FWHM</b> | <b>Peak area</b> |
| (O 1s) O <sup>2-</sup>                   | 529.7                     | 1.27        | 4878             |
| (O 1s) V <sub>o</sub> (Oxygen vacancy)   | 531.0                     | 2.93        | 3683             |
|                                          |                           |             |                  |
| <b>BCST1</b>                             | <b>Peak position(eV)</b>  | <b>FWHM</b> | <b>Peak area</b> |
| (O 1s) O <sup>2-</sup>                   | 530.4                     | 1.46        | 4498             |
| (O 1s) V <sub>o</sub>                    | 532.1                     | 1.88        | 3809             |
| (O 1s) O <sup>*</sup>                    | 528.4                     | 1.11        | 279              |
| <b>BCST1</b>                             | <b>Peak position (eV)</b> | <b>FWHM</b> | <b>Peak area</b> |
| (O 1s) V <sub>o</sub>                    | 531.9                     | 1.76        | 8713             |
| (O 1s) mixed valence state               | 528.8                     | 2.14        | 2336             |

**EST3: Deconvoluted peak area fitted from Athena for BST, BSCT1 and BSCT2 sample**

| Sample       | Area under first peak (A) | Area under 2nd peak (B) | Area under 3rd peak (C) | Area under 4th peak (D) |
|--------------|---------------------------|-------------------------|-------------------------|-------------------------|
| <b>BST</b>   | 0.03                      | 0.35                    | 0.26                    | 0.94                    |
| <b>BSCT1</b> | 0.06                      | 2.25                    | 0.42                    | 0.69                    |
| <b>BSCT2</b> | 0.07                      | 3.50                    | 0.63                    | 0.40                    |
